# Supplementary material for: Sensitive detection of copper(ii) ions based on the conformational change of peptides by surface plasmon resonance spectroscopy
Source: Royal Society of Chemistry journal article supplement (doi:10.1039/c5ay02047f), 2015-01-01
Supplement: c5ay02047f1.pdf [file c5ay02047f1.pdf]

## Electronic Supplementary Information

### Sensitive detection of copper (II) ion based on conformational change of peptide by surface plasmon resonance spectroscopy

Hongxia Chen<sup>a</sup>, Shengsong Jia<sup>a,b</sup>, Jiangjiang Zhang<sup>a</sup>, Minji Jang<sup>c</sup>, Xiuying Chen<sup>a</sup>, Kwangnak Koh<sup>d</sup>, Zhaoxia Wang<sup>e,\*</sup>

<sup>a</sup>Laboratory of Biosensing Technology, School of Life Sciences, Shanghai University, Shanghai 200444, China

<sup>b</sup>Shanghai Key Laboratory of Bio-Energy Crops, School of Life Sciences, Shanghai University, Shanghai 200444, China

<sup>c</sup>Department of Nano Fusion Engineering, Pusan National University, Busan 609-735, Republic of Korea

<sup>d</sup>Institute of General Education, Pusan National University, Busan 609-735, Republic of Korea

<sup>e</sup>Department of Oncology, The Second Affiliated Hospital of Nanjing Medical University, Nanjing 210011, PR China

\*Corresponding author. Tel.: +86 25 58509810. E-mail address: zhaoxiawang88@hotmail.com (Z.Wang).

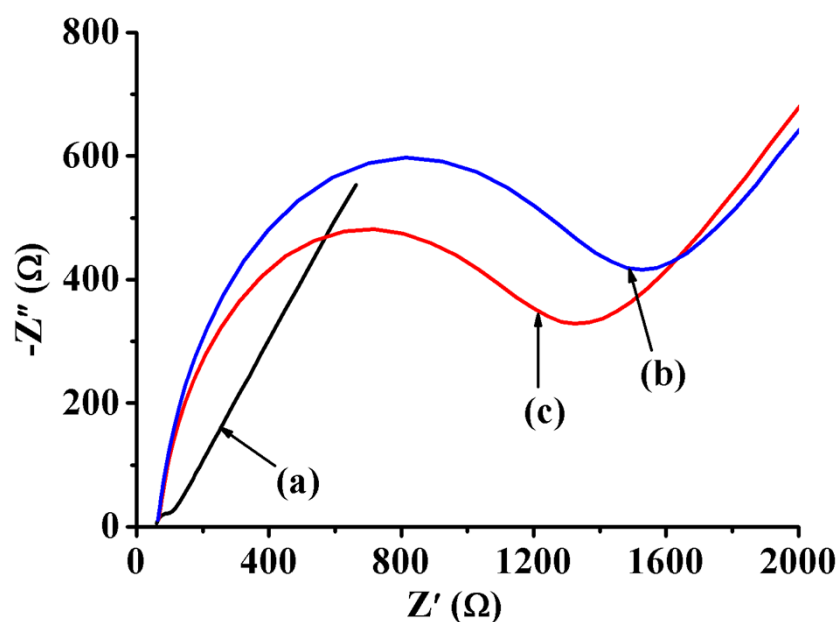

Figure S1 Nyquist plots corresponding to (a) bare gold electrode, (b) peptide modified electrode, (c) after incubation with  $\text{Cu}^{2+}$ . Bias potential: 0.224 V.
